# Supplementary material
Source: ML conference proceedings conference paper supplement (https://openreview.net/forum?id=33XGfHLtZg)
Supplement: supplementary_material [file attachment]

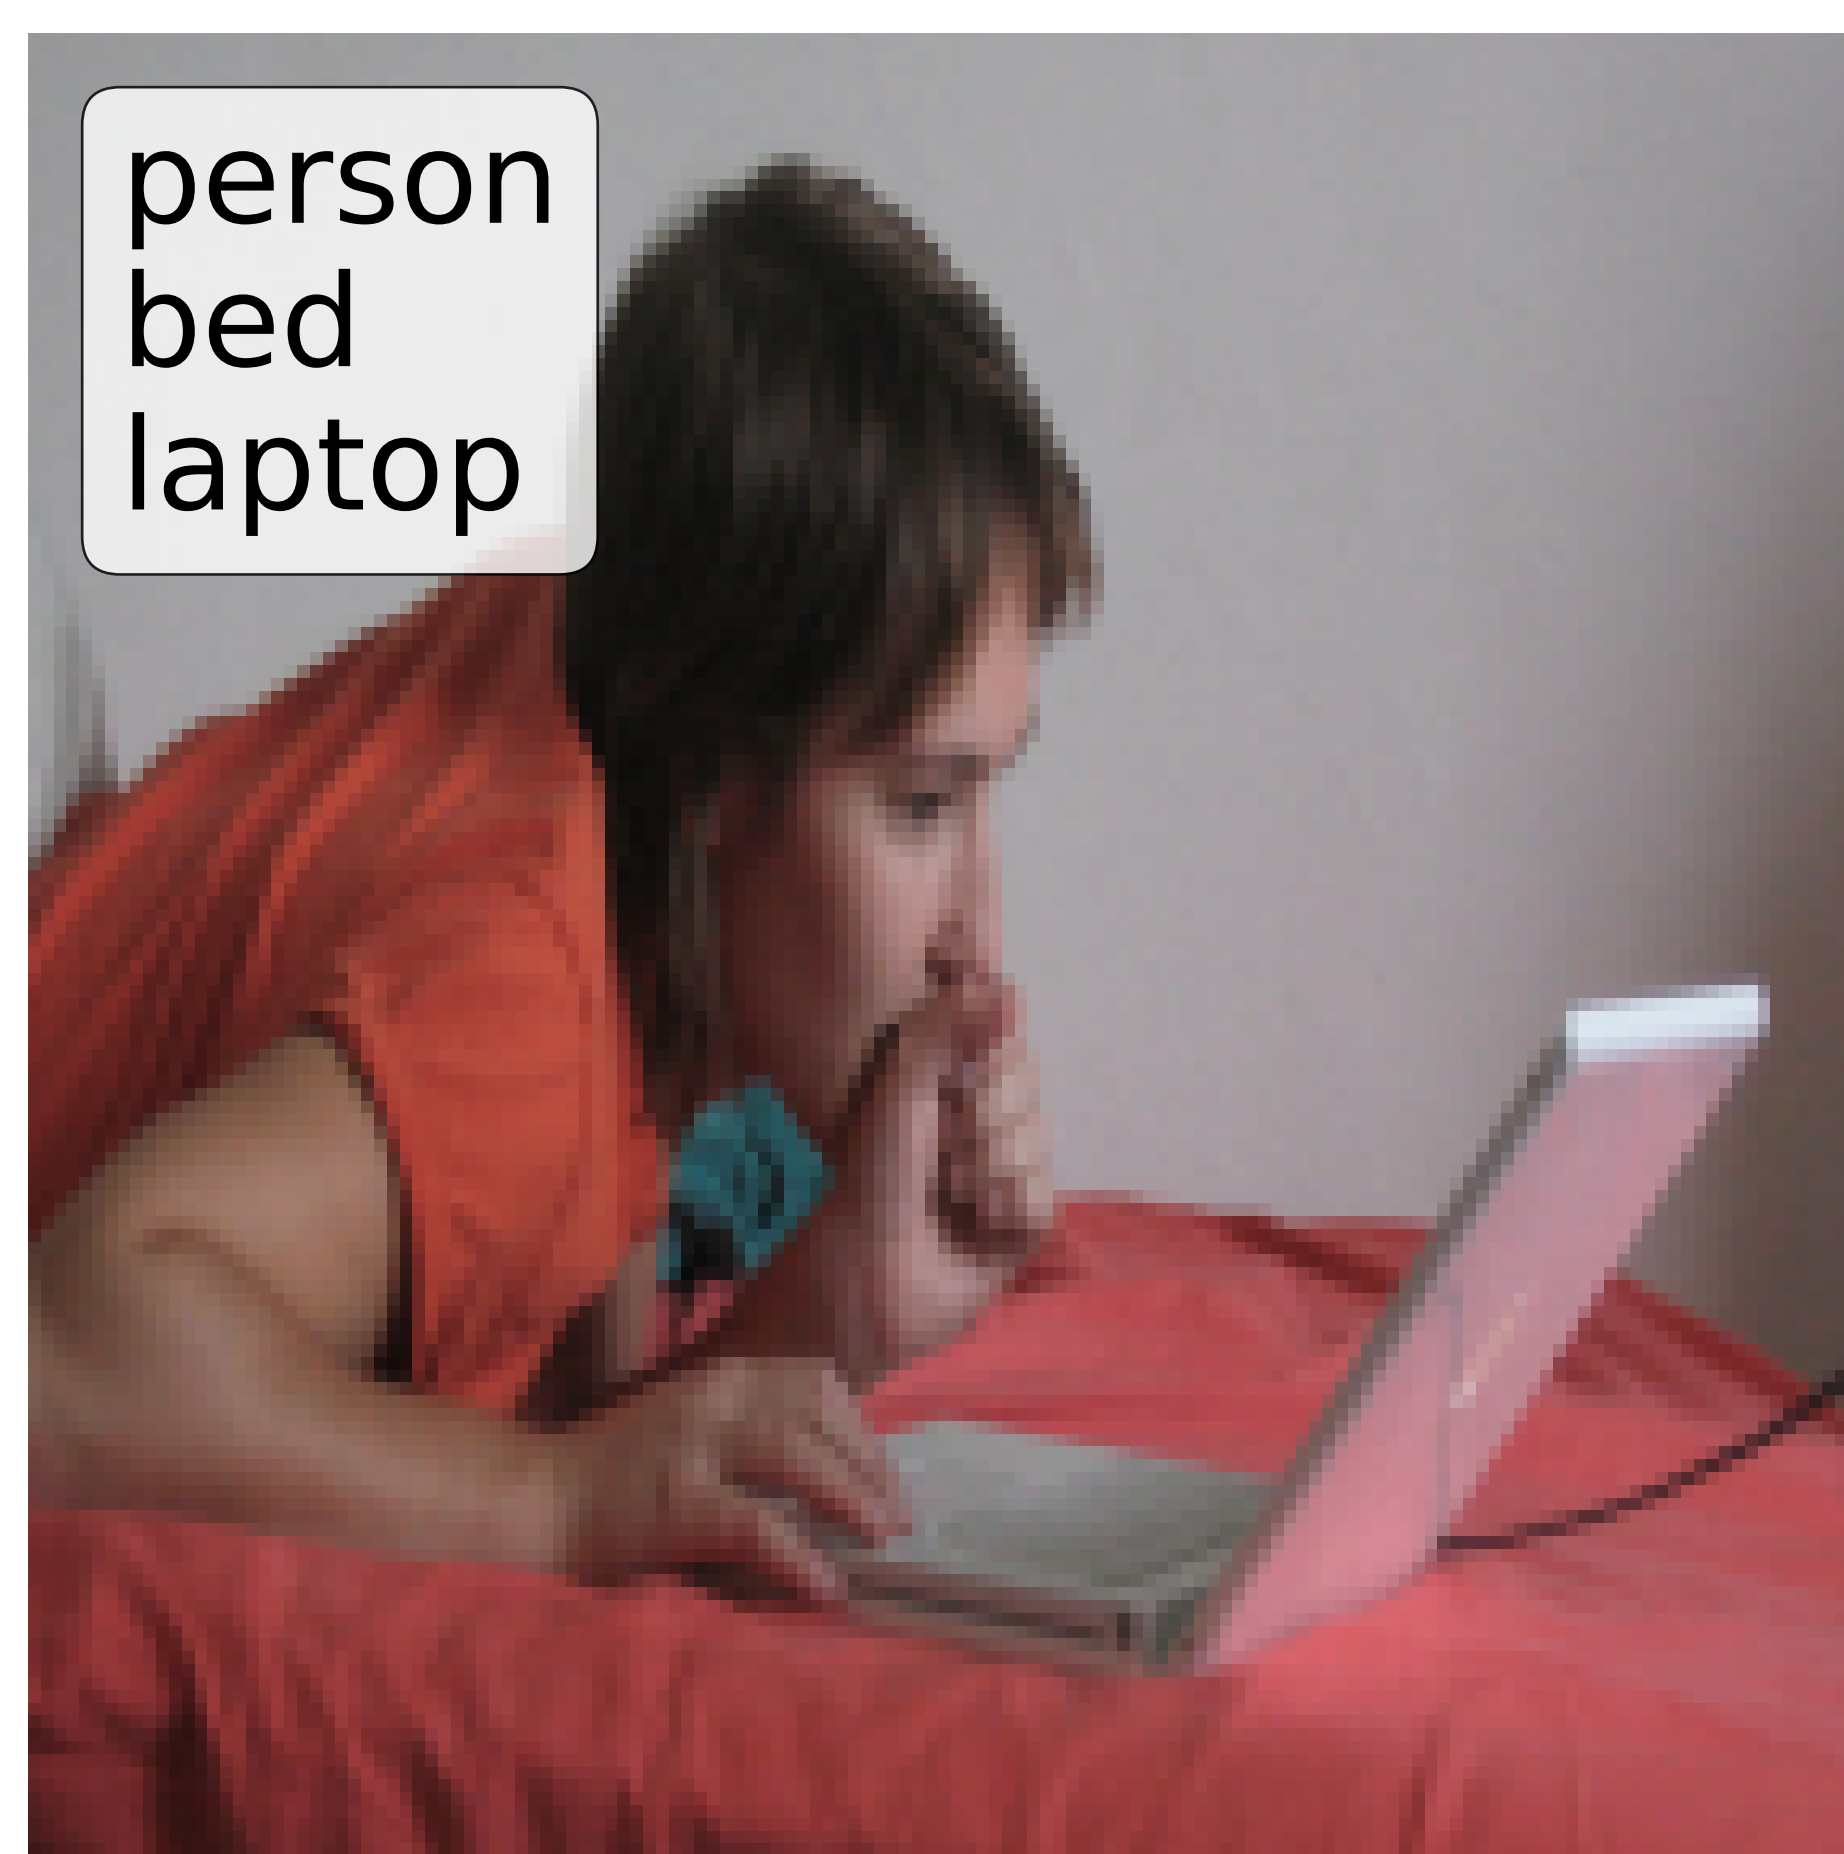

person  
bed  
laptop

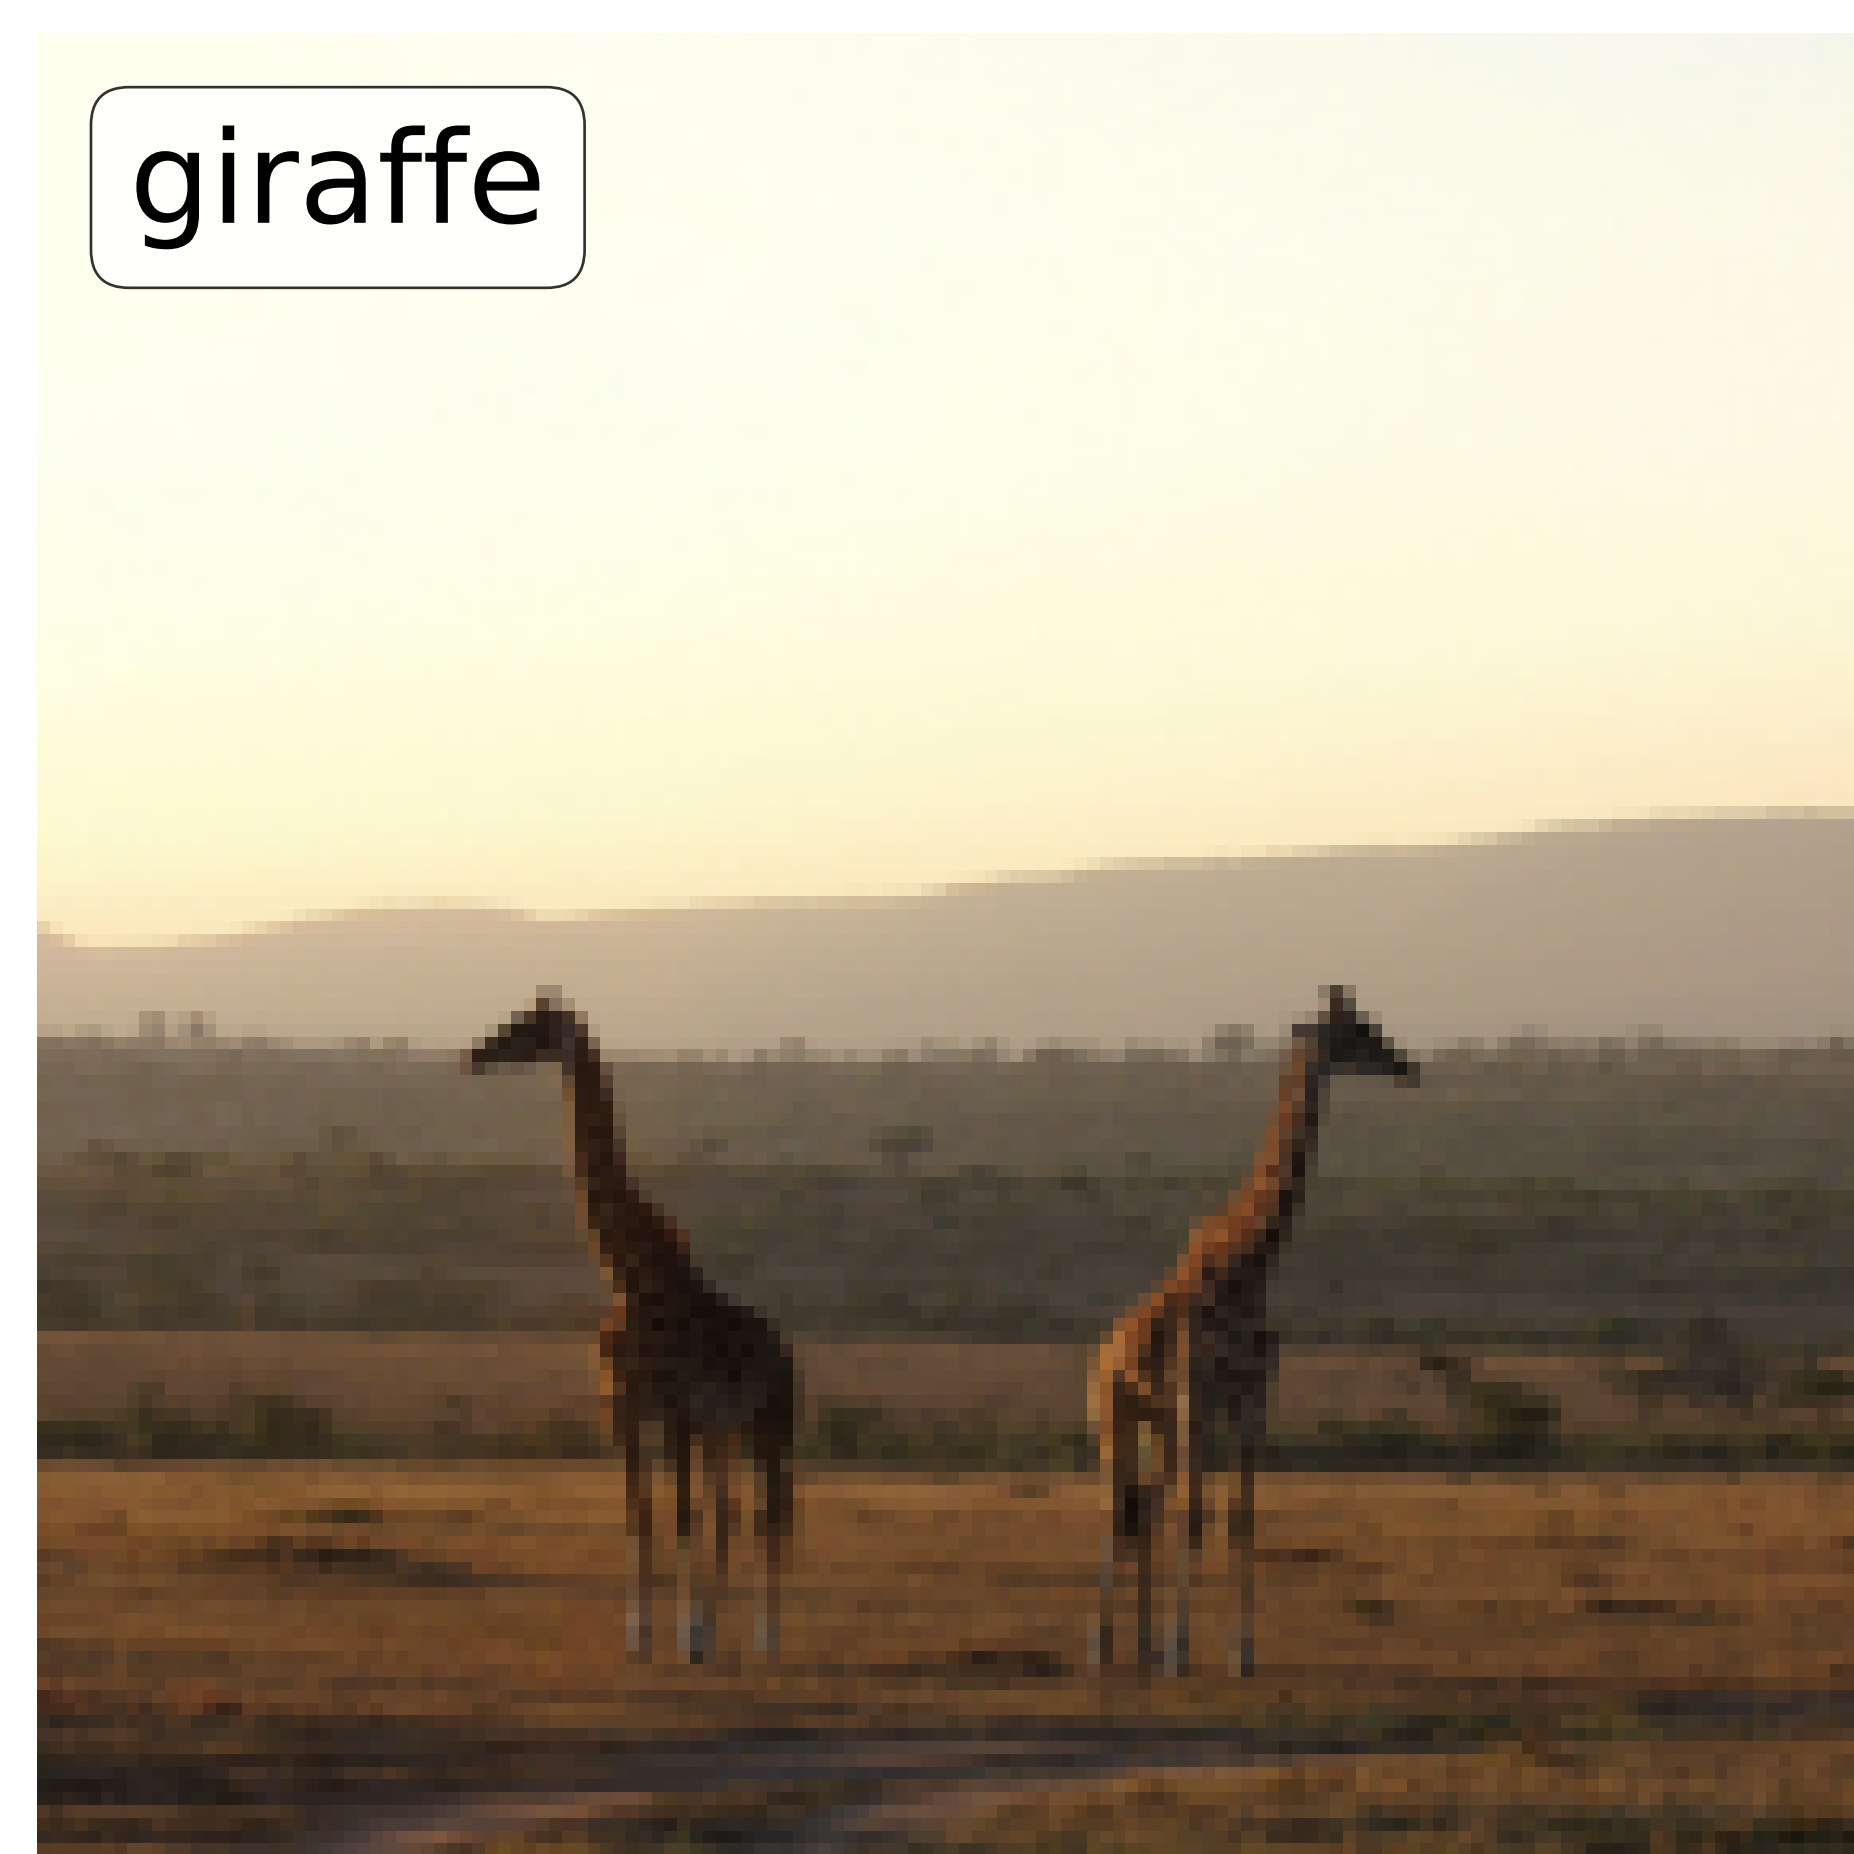

giraffe

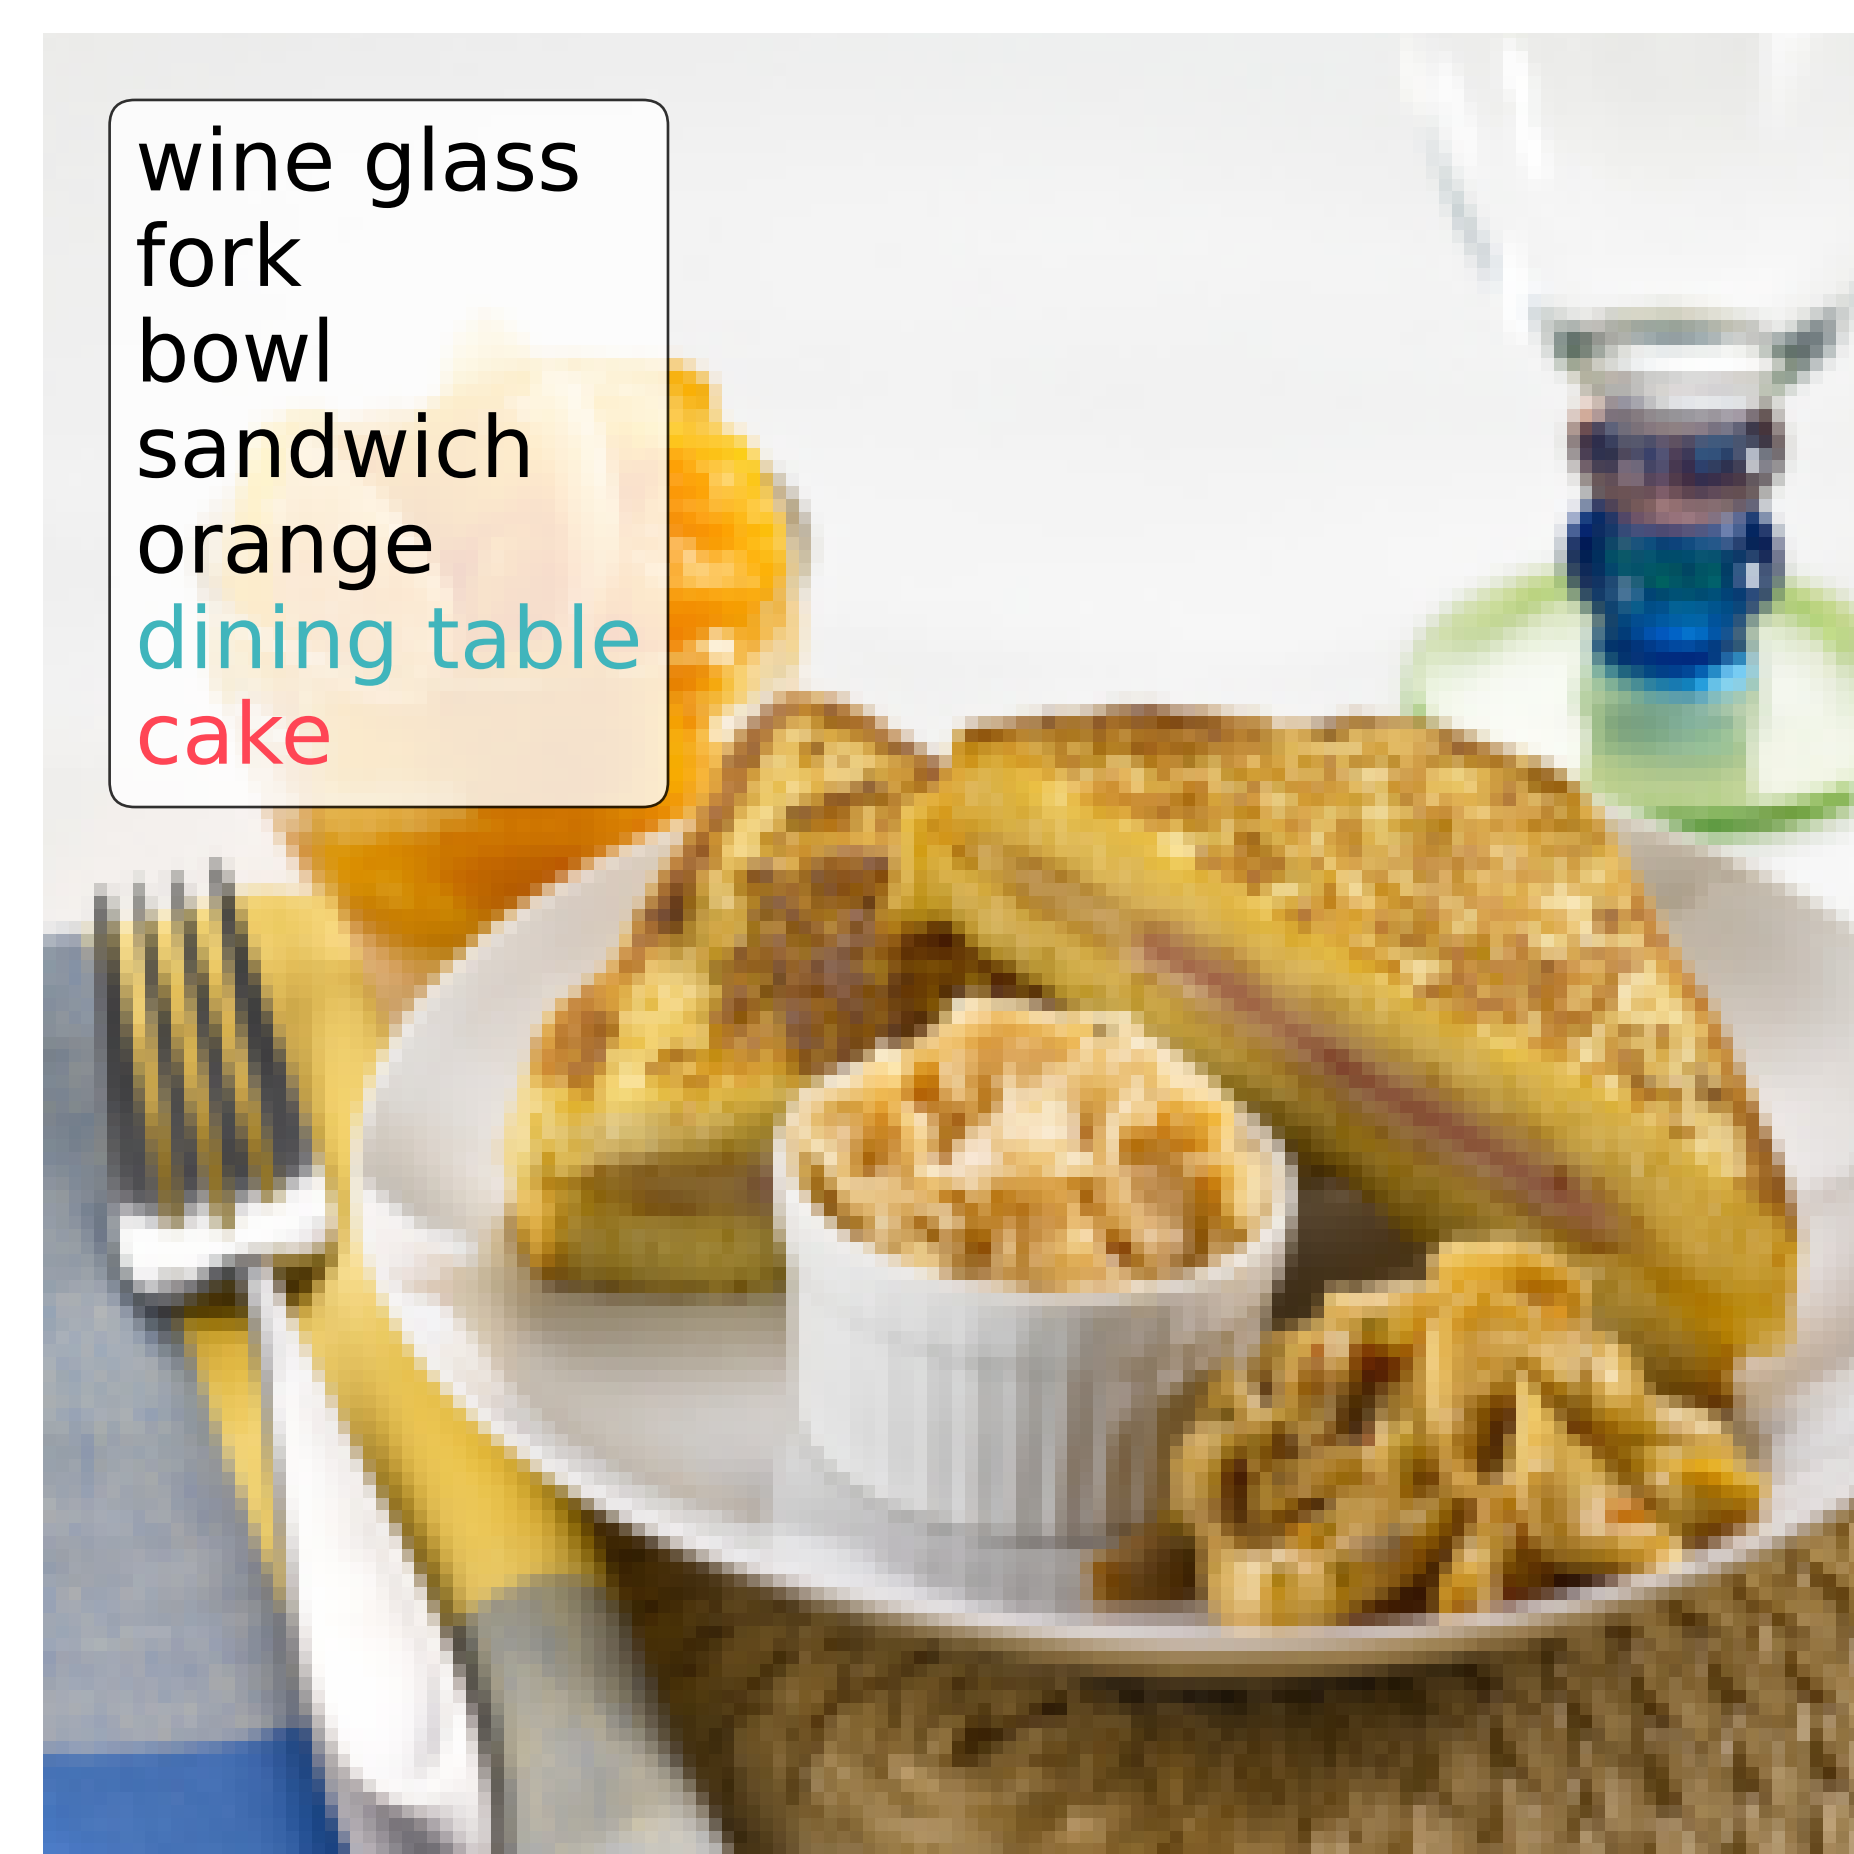

wine glass  
fork  
bowl  
sandwich  
orange  
dining table  
cake

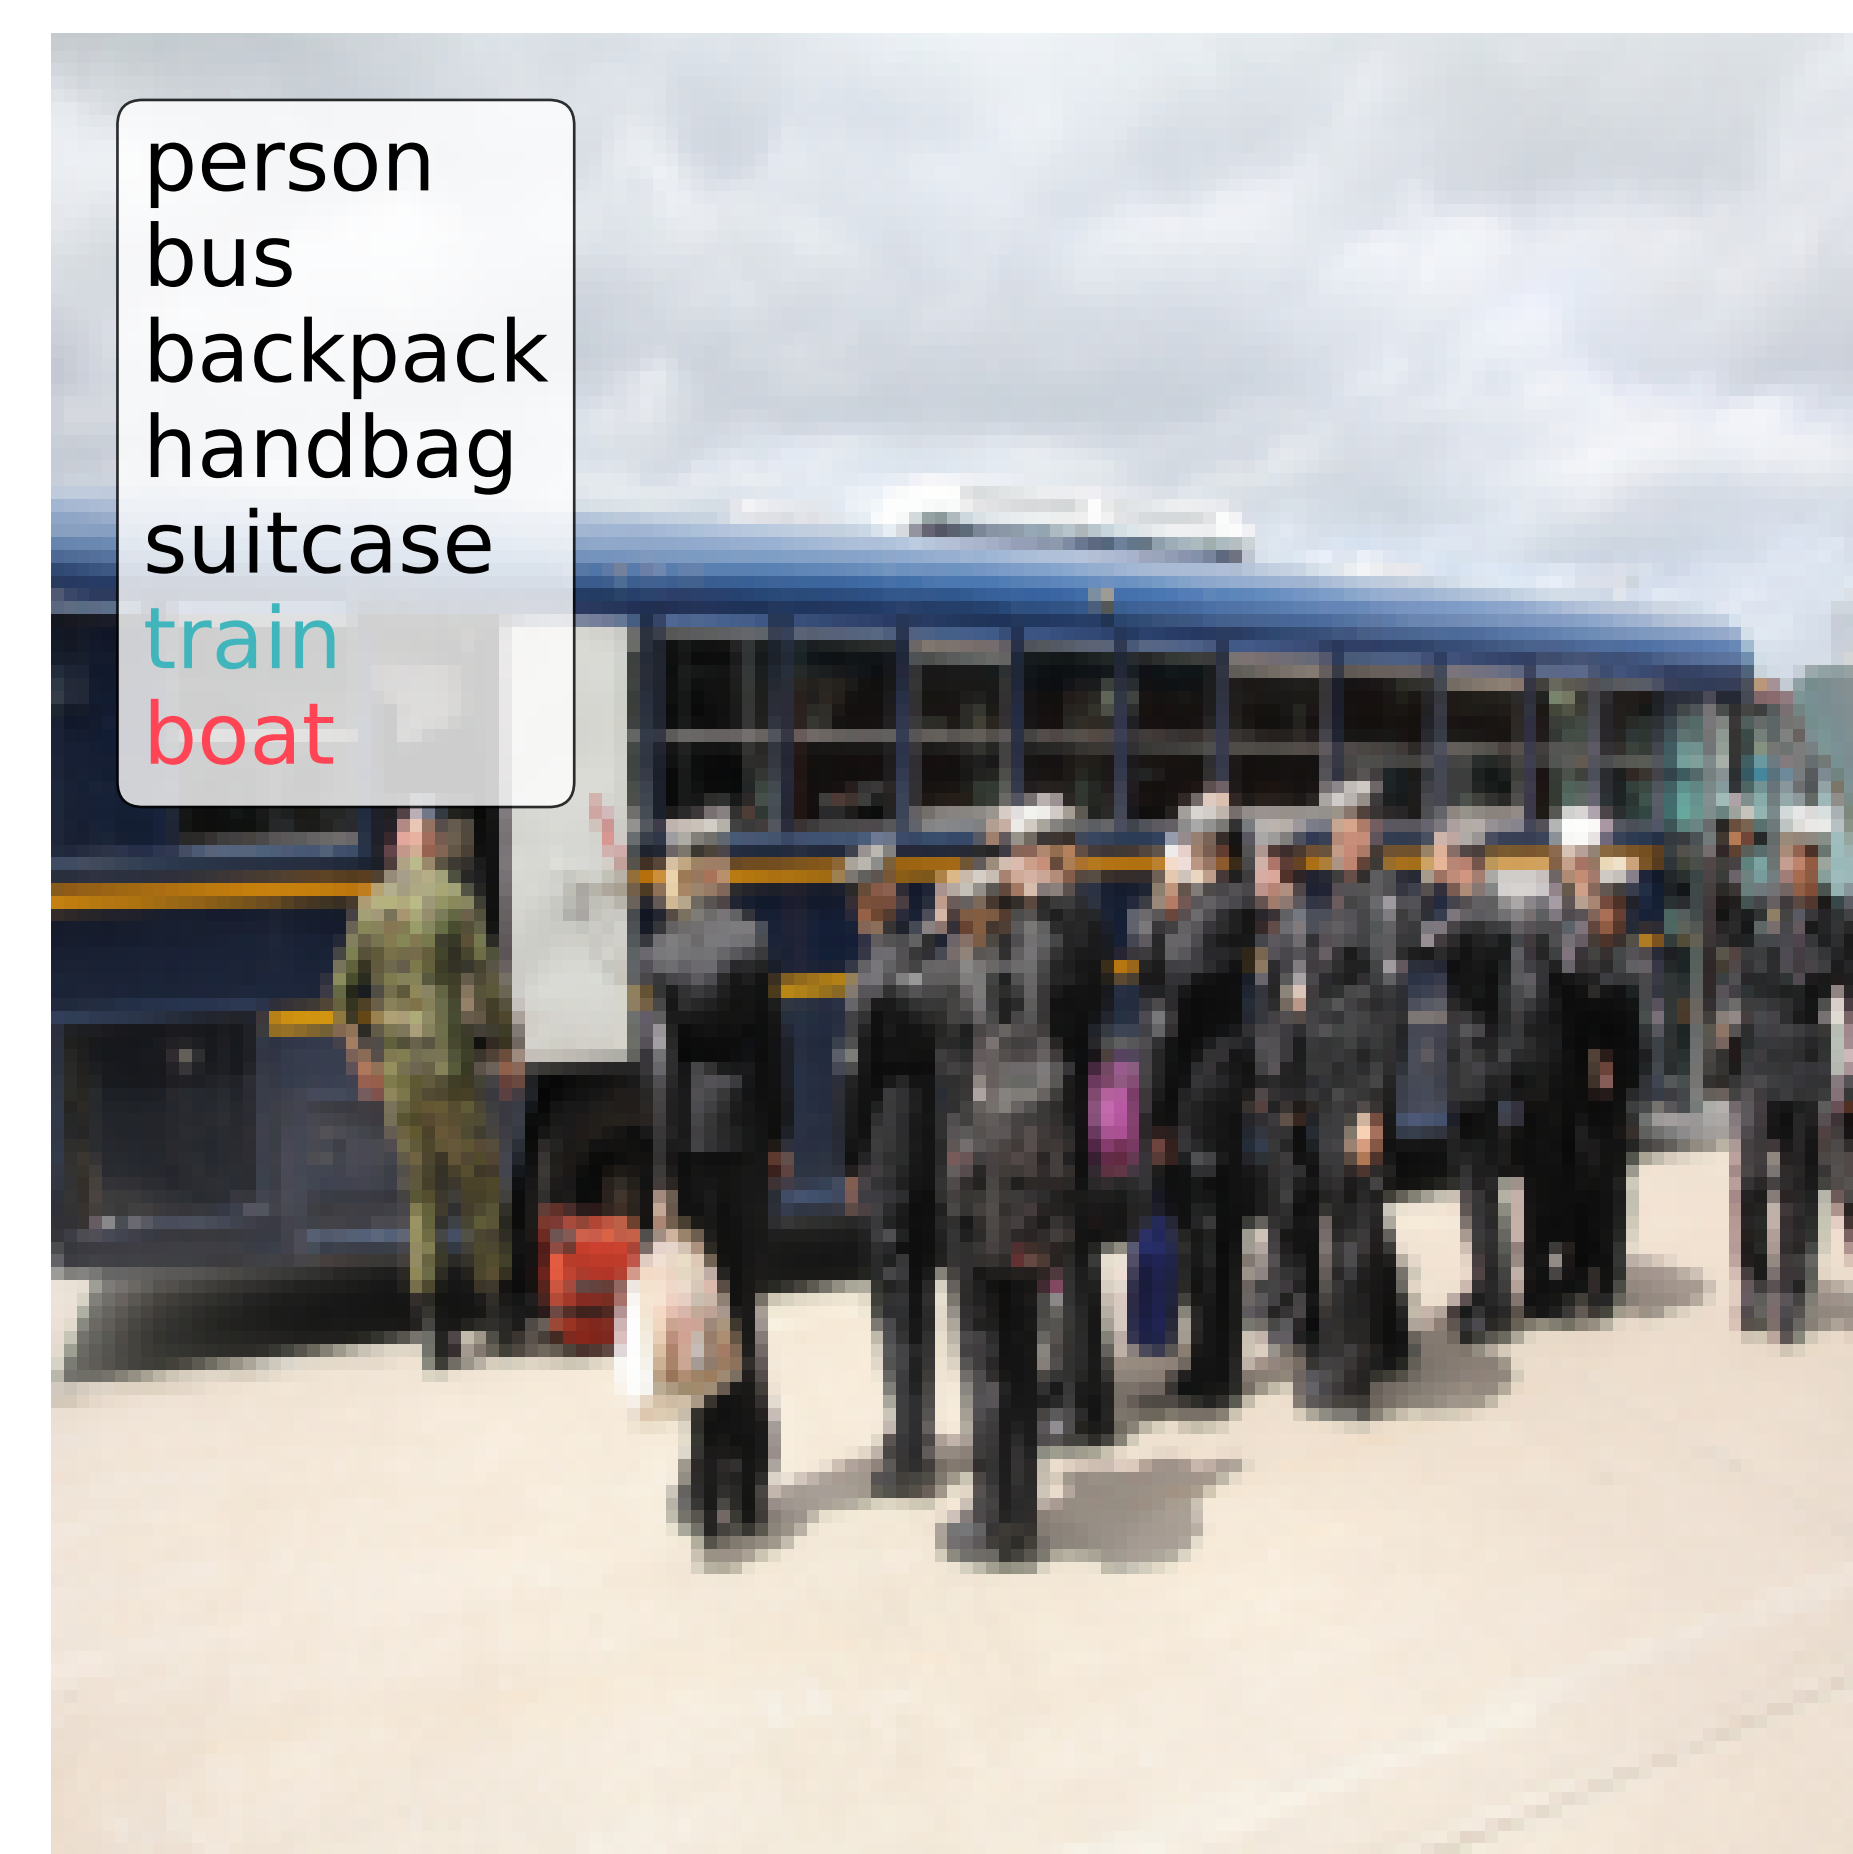

person  
bus  
backpack  
handbag  
suitcase  
train  
boat

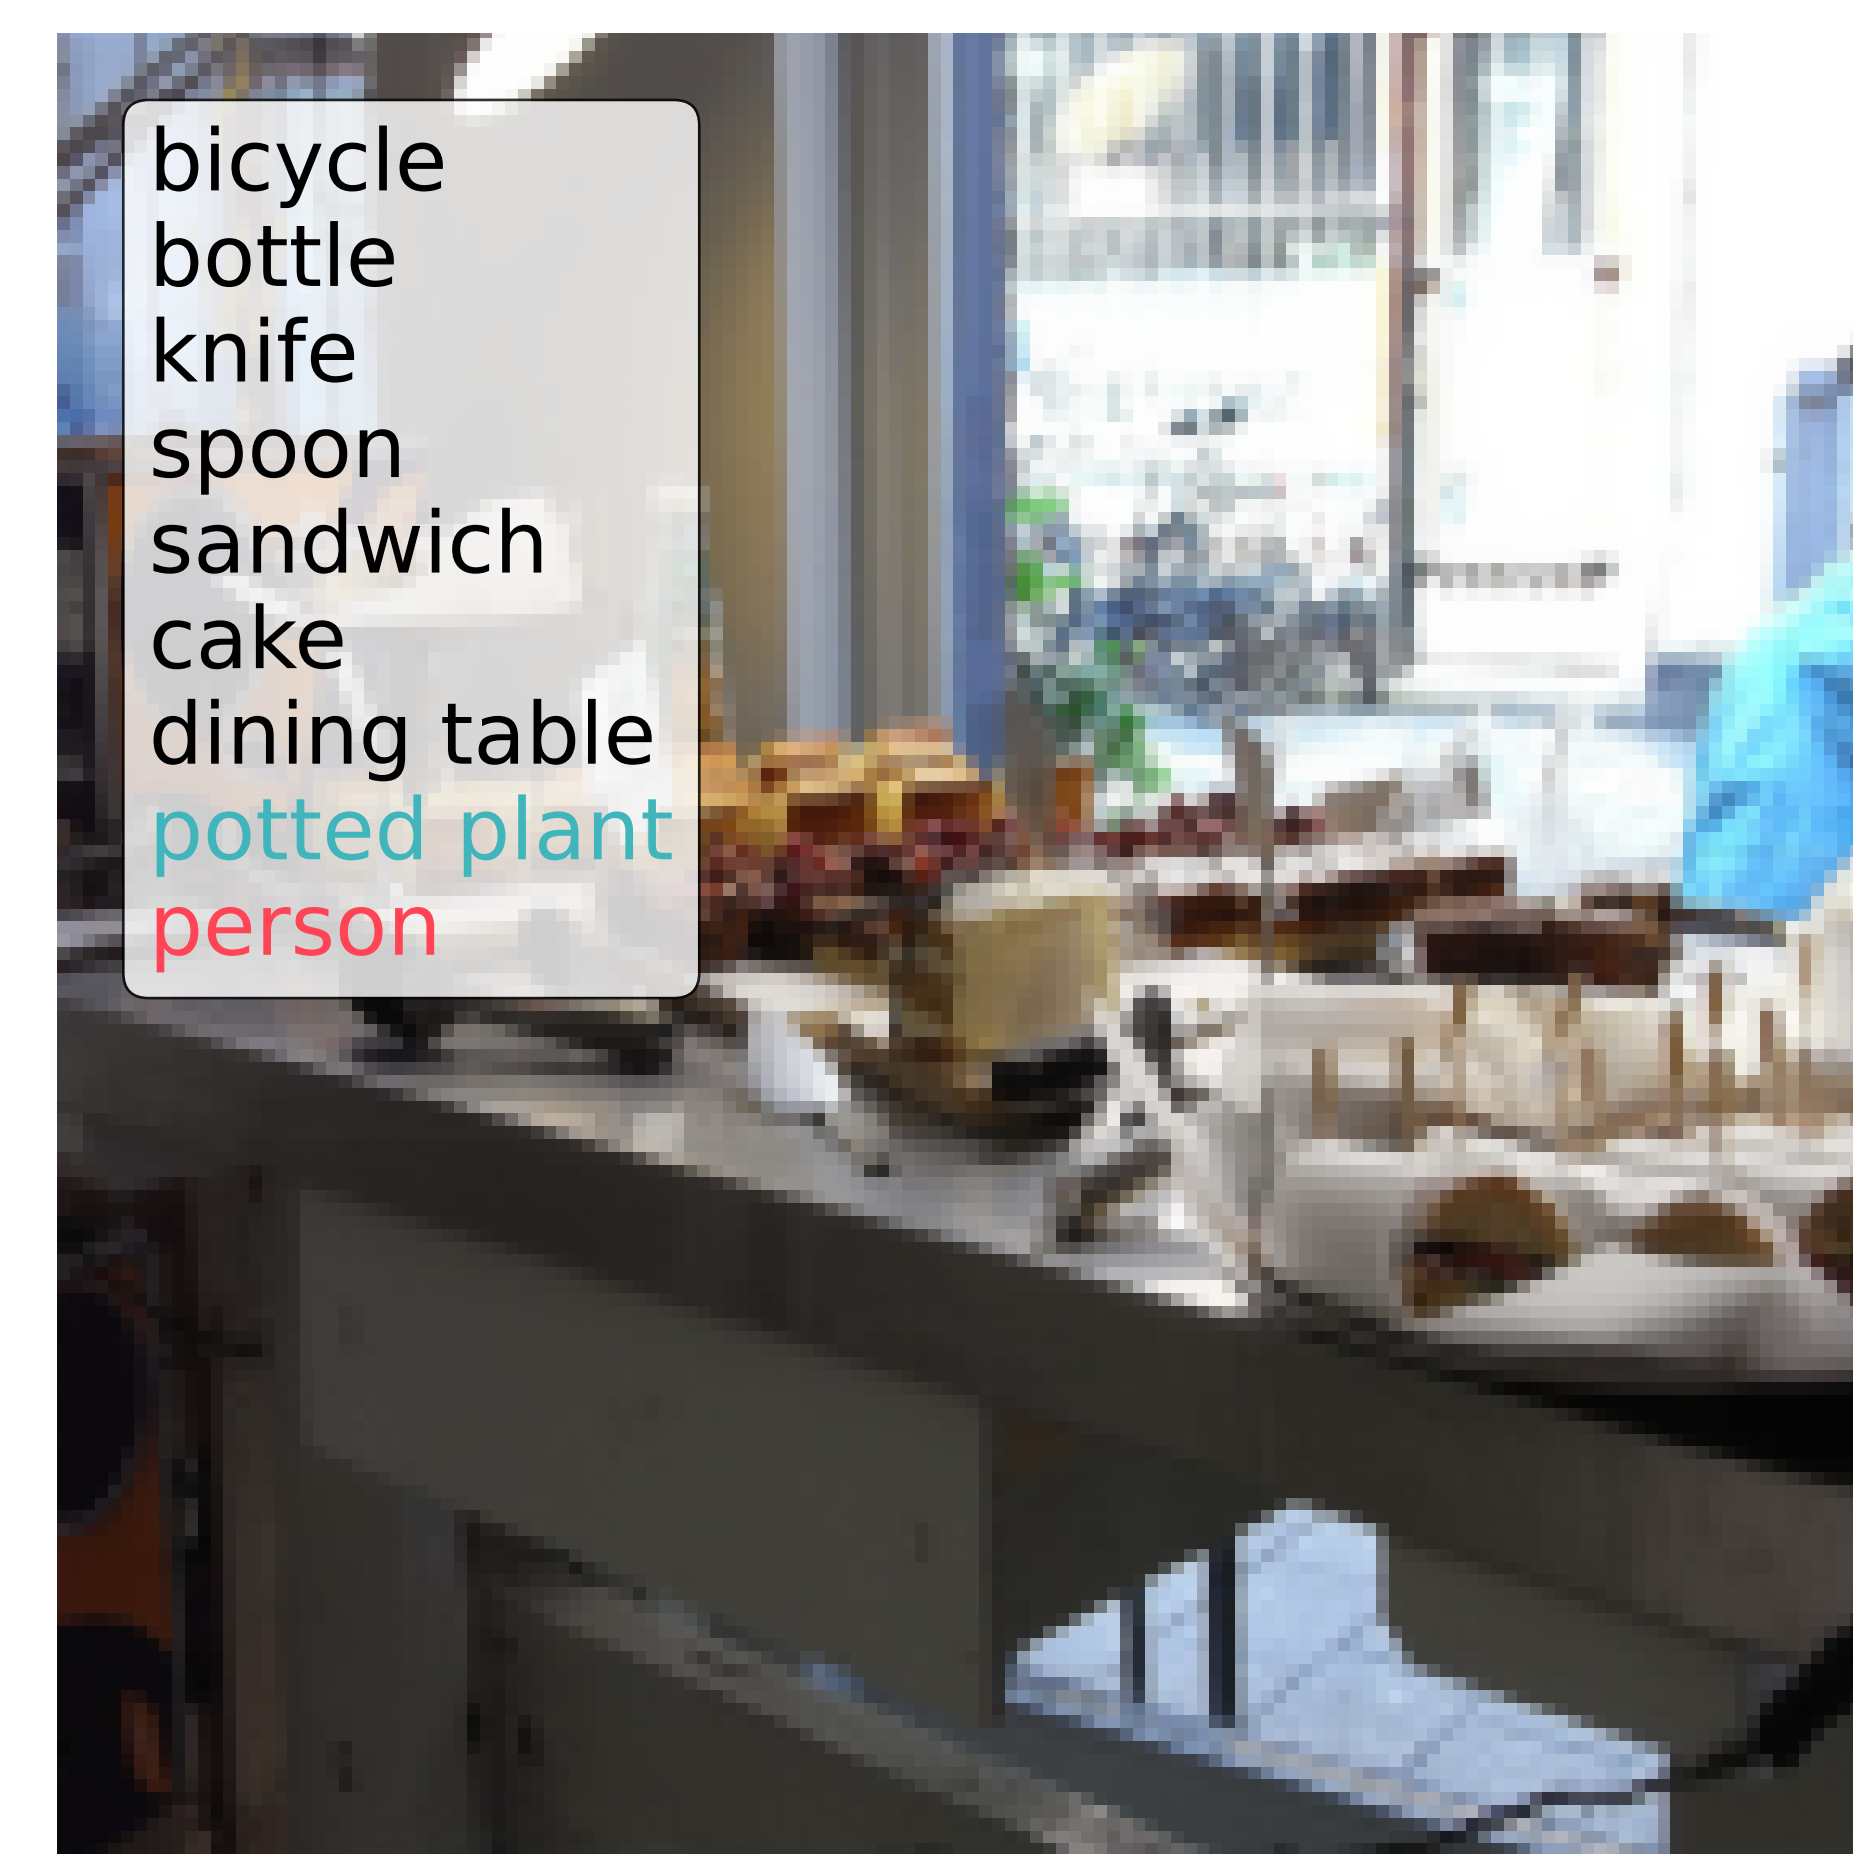

bicycle  
bottle  
knife  
spoon  
sandwich  
cake  
dining table  
potted plant  
person

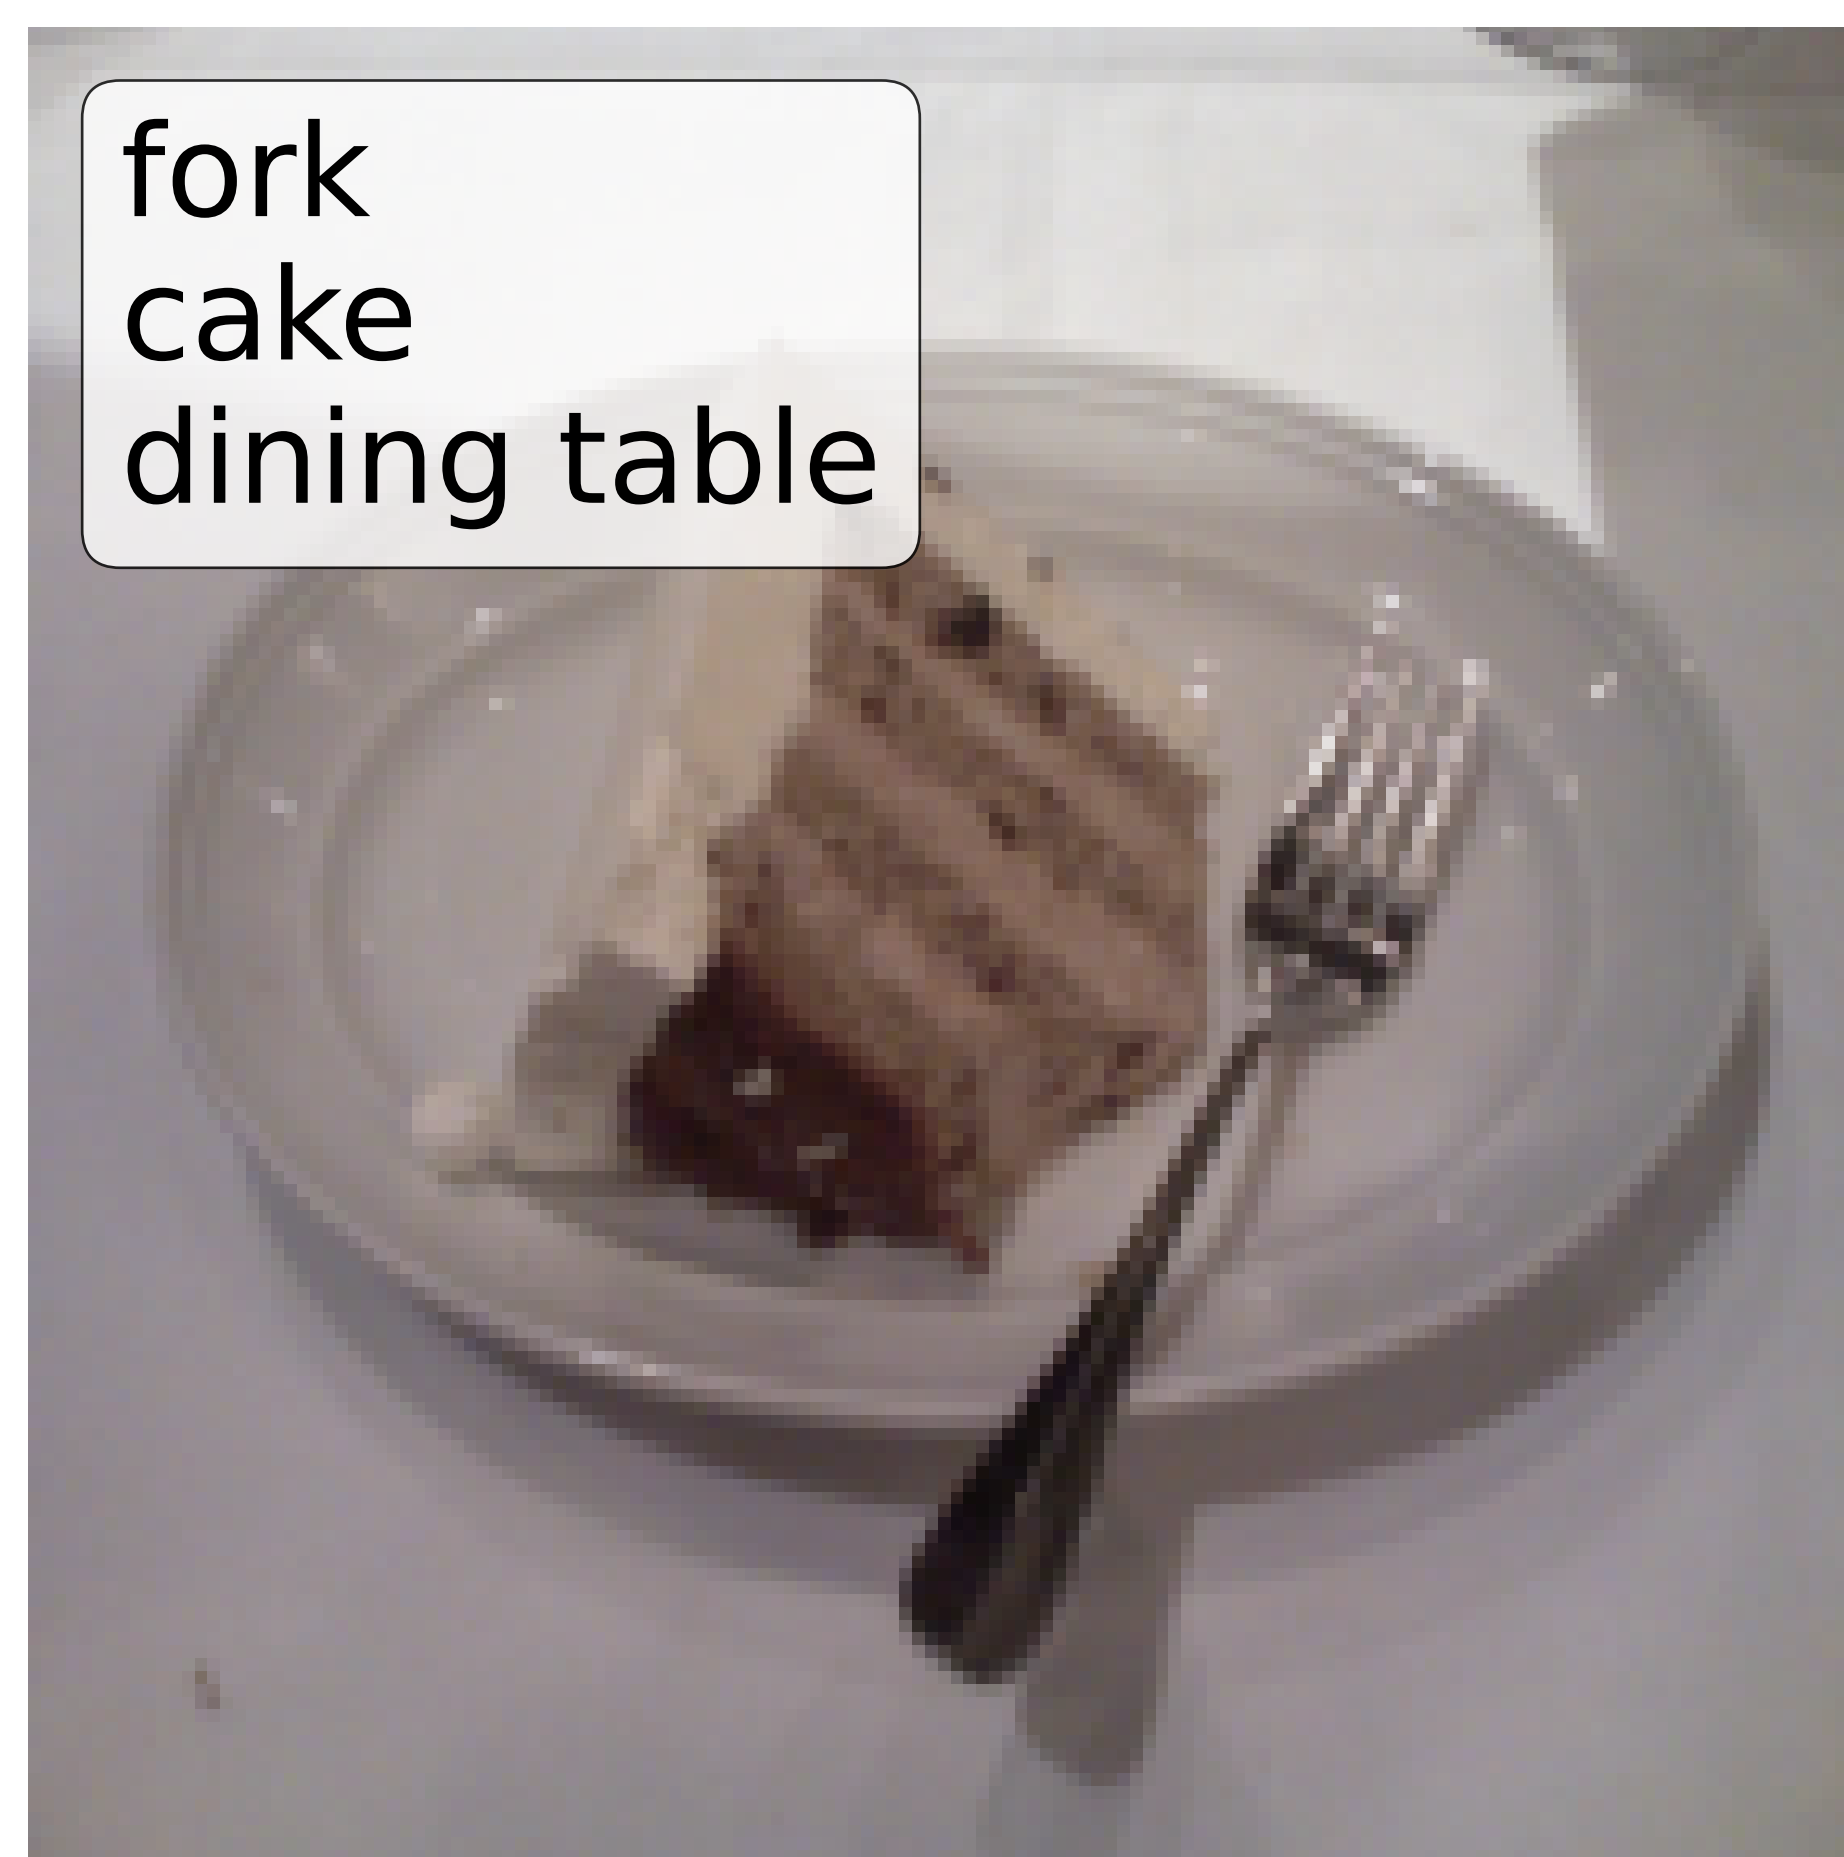

fork  
cake  
dining table

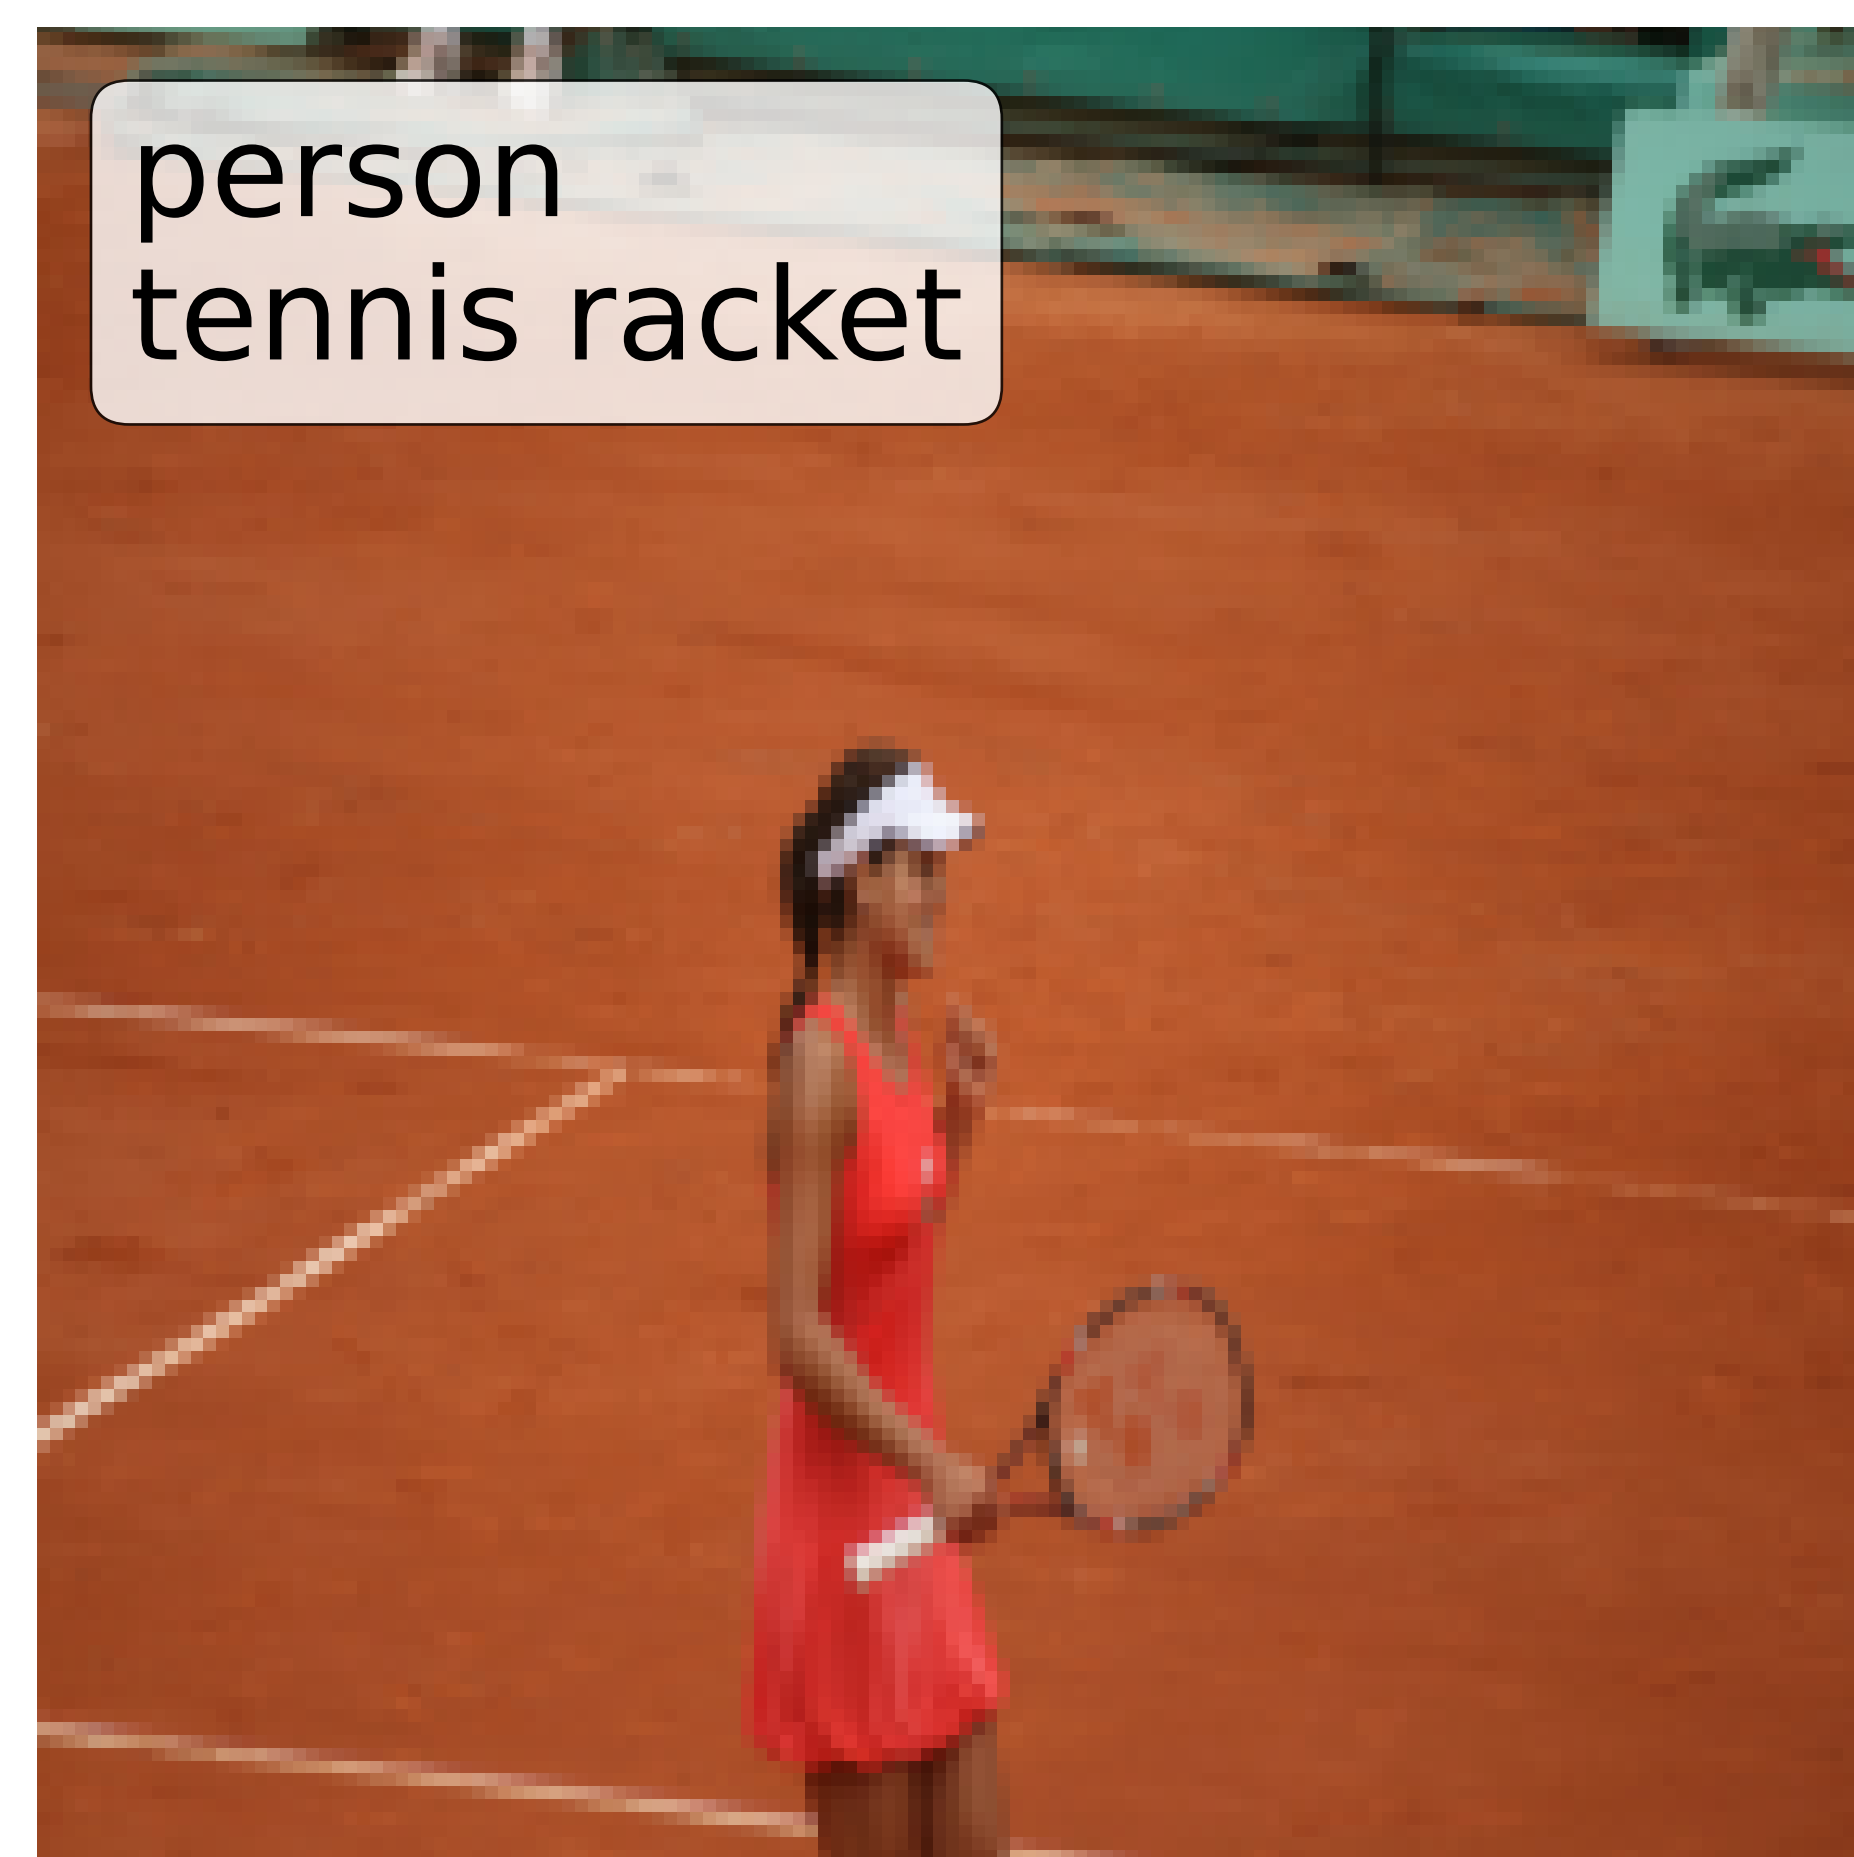

person  
tennis racket

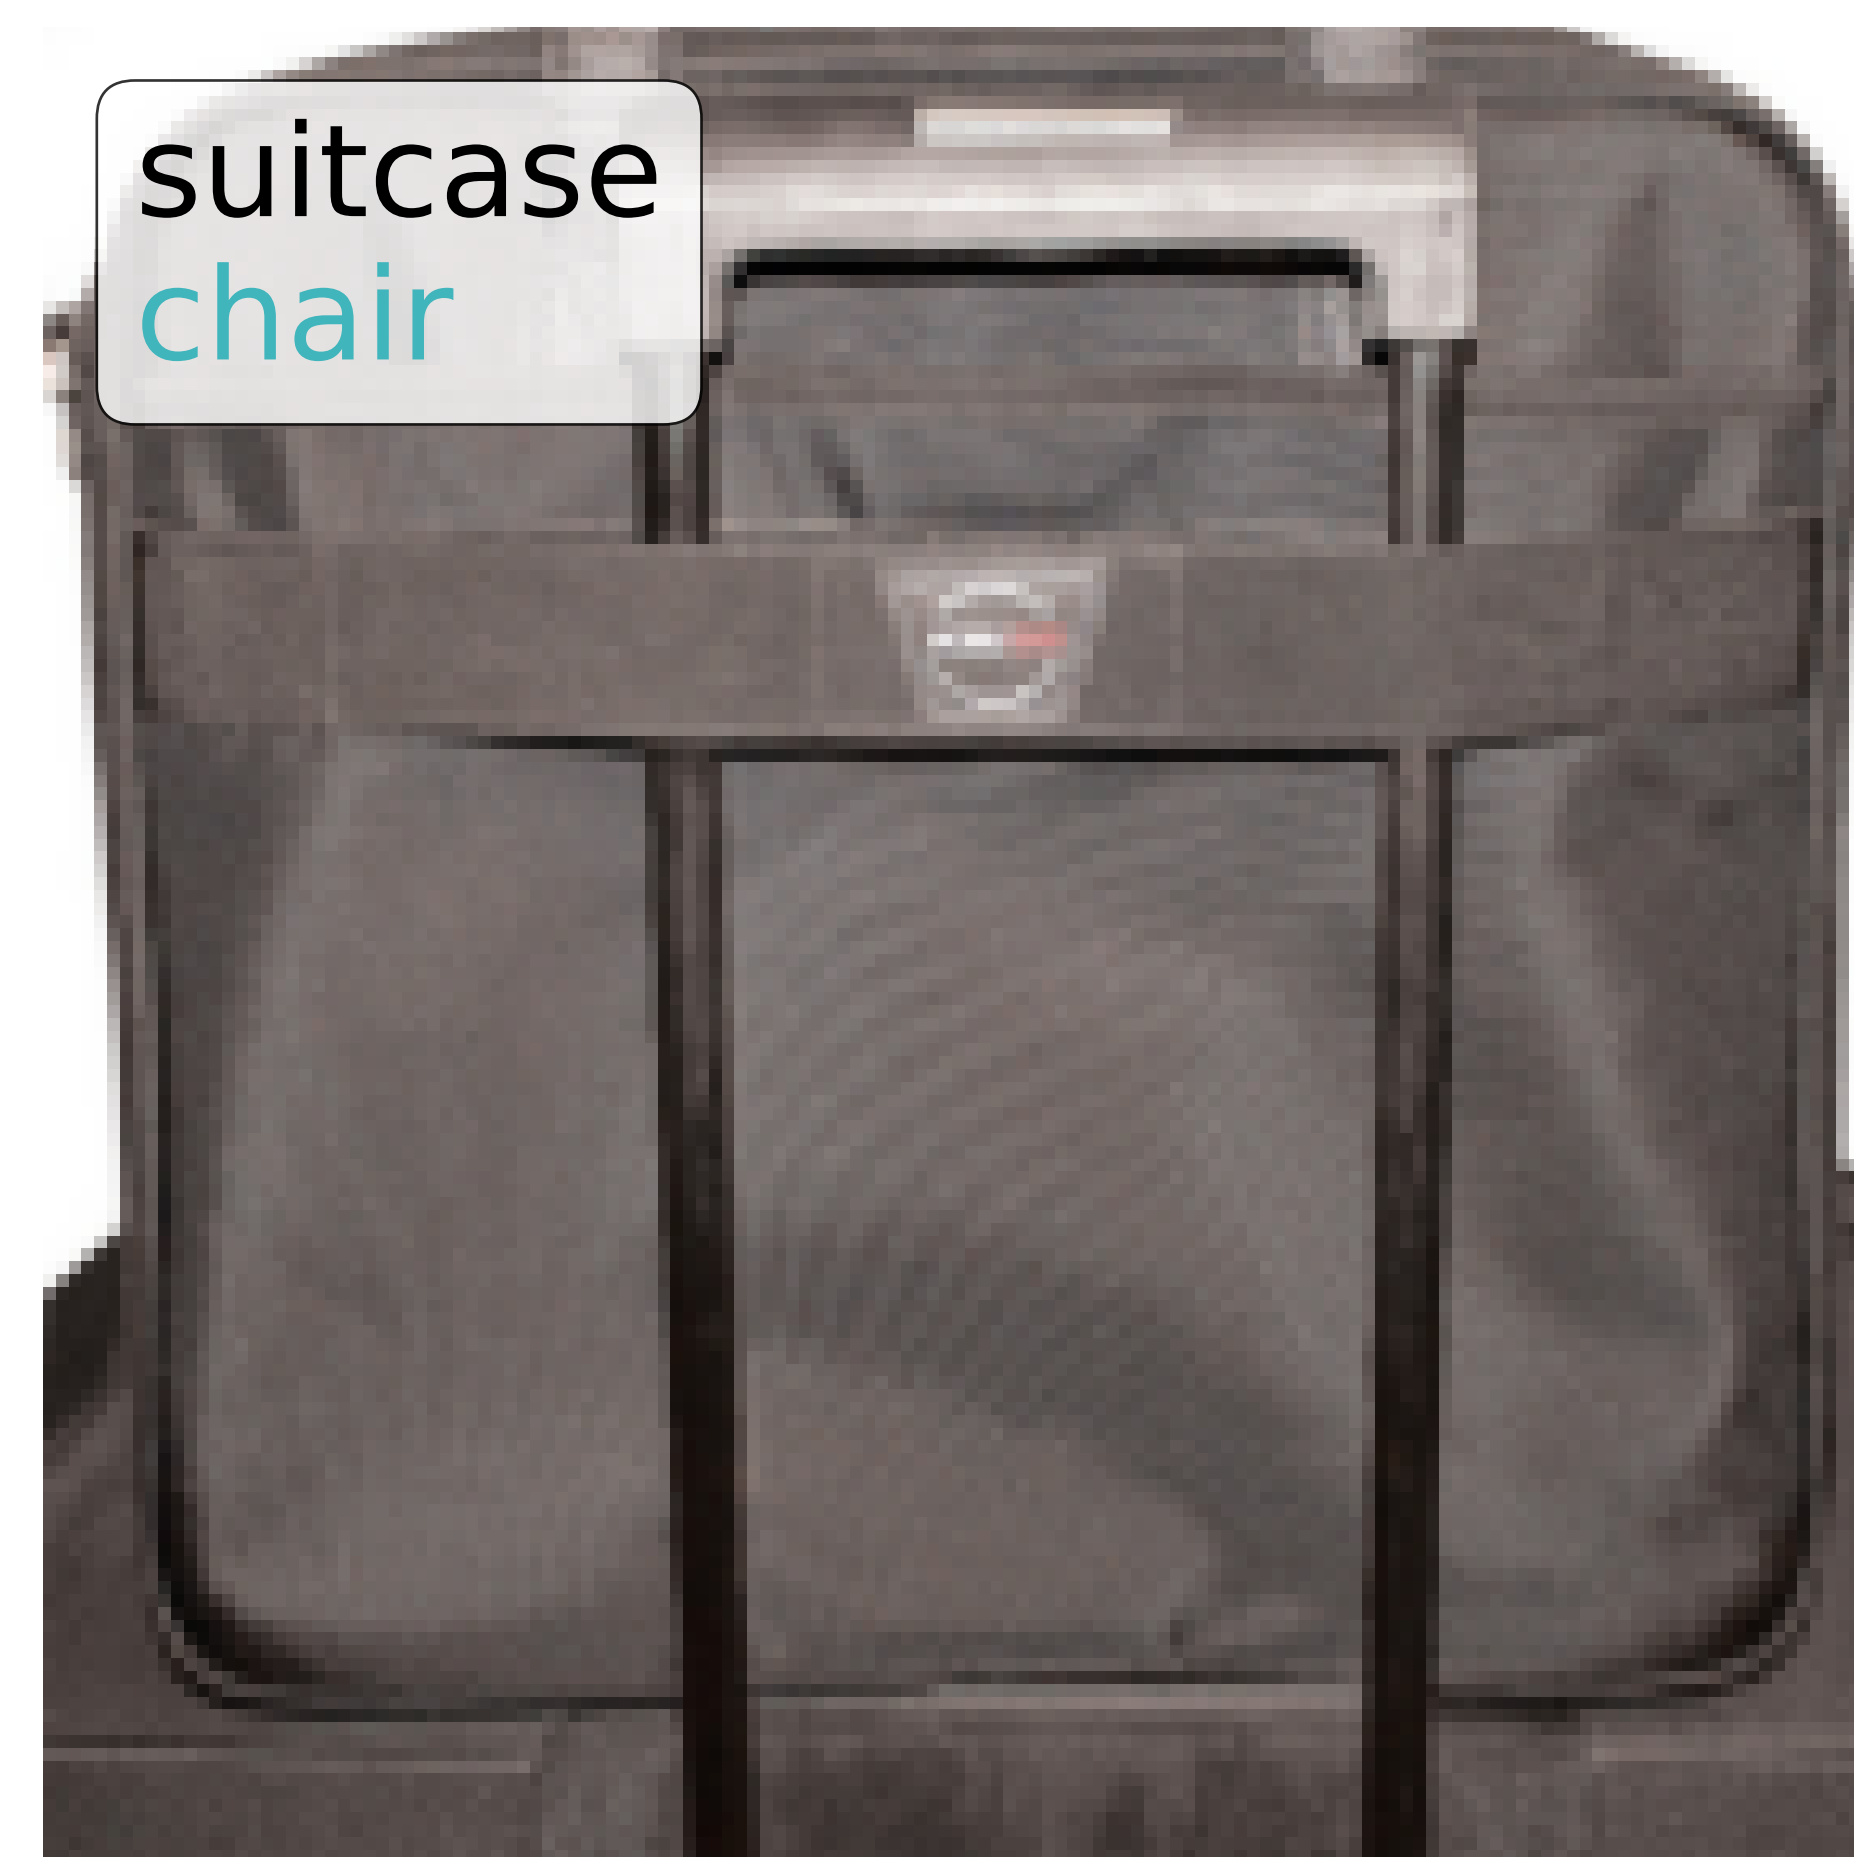

suitcase  
chair

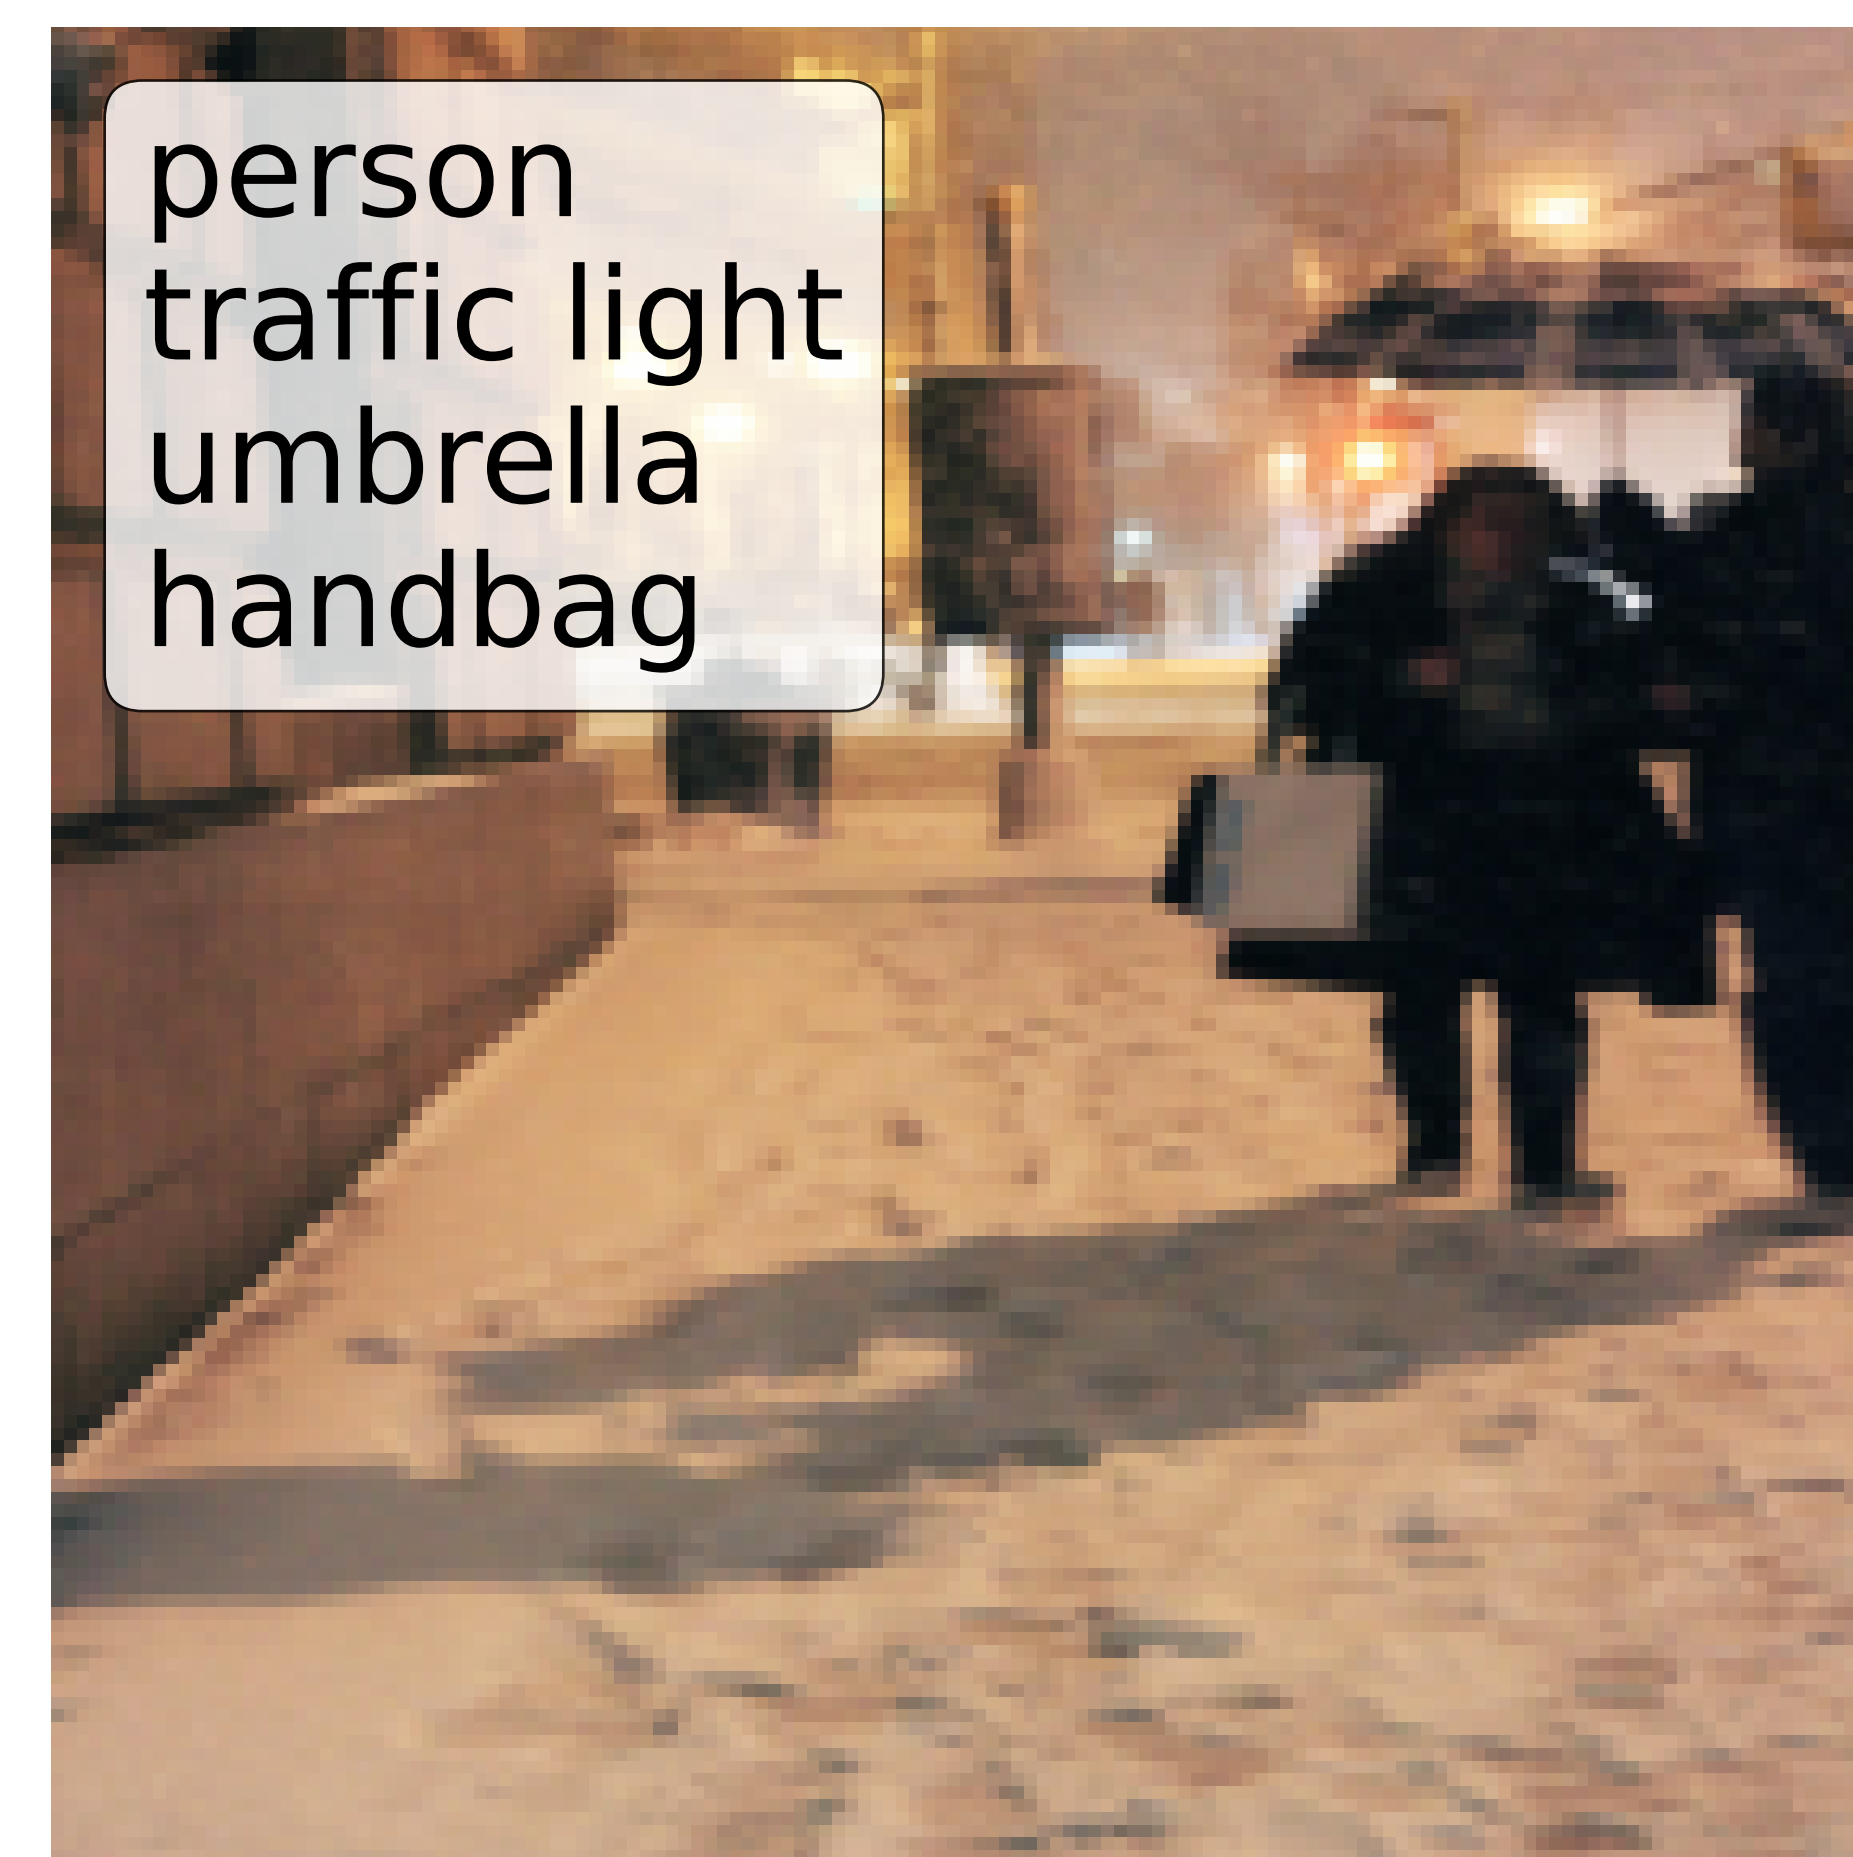

person  
traffic light  
umbrella  
handbag

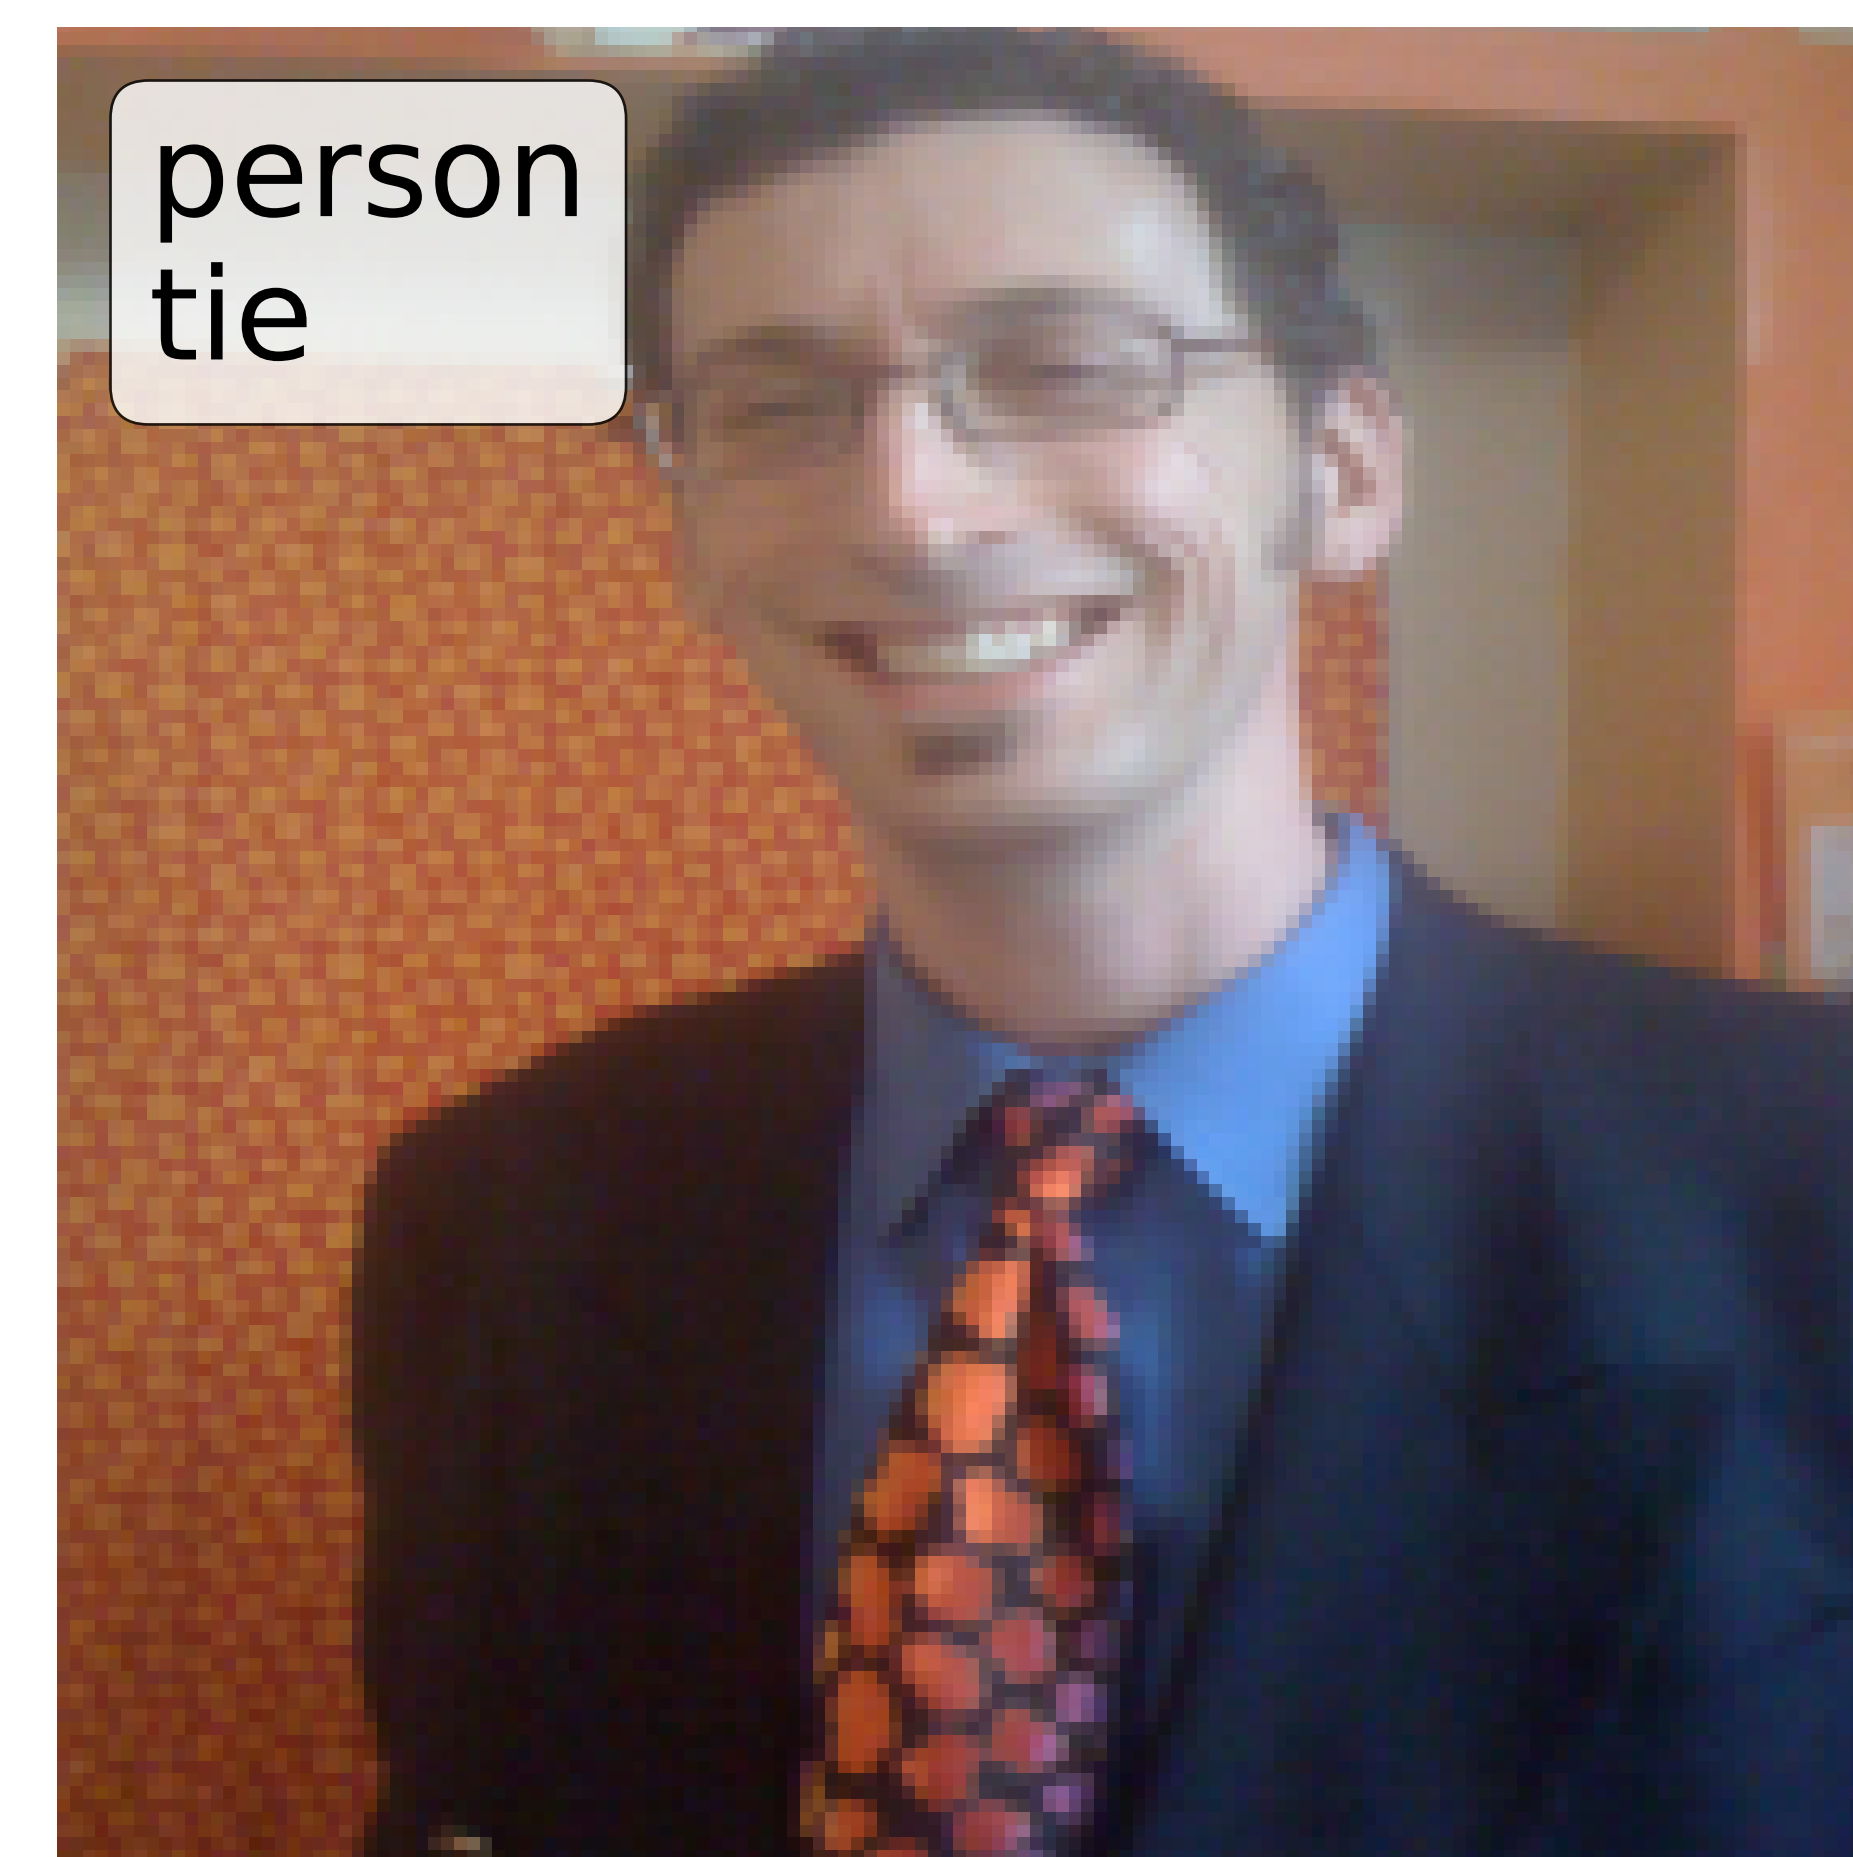

person  
tie
